# Supplementary material for: Improving the efficiency and sustainability of chitin bioconversion through a combination of Streptomyces chitin-active-secretomes and mechanical-milling
Source: Royal Society of Chemistry journal article supplement (doi:10.1039/d3gc01084h), 2023-01-01
Supplement: d3gc01084h1.pdf [file d3gc01084h1.pdf]

**Improving the efficiency and sustainability of chitin bioconversion through a combination of *Streptomyces* chitin-active-secretomes and mechanical-milling**

Lal Duhsaki, Saumashish Mukherjee and Jogi Madhuprakash\*

Department of Plant Sciences, School of Life Sciences, University of Hyderabad,  
Gachibowli, Hyderabad-500046, Telangana, India.

**\*Author for correspondence:**

Dr. Jogi Madhuprakash  
Department of Plant Sciences  
School of Life Sciences  
University of Hyderabad  
Prof. CR Rao Road, Gachibowli,  
Hyderabad-500046, India  
Tel: +91-40-23134566  
Fax: +91-40-23010120  
E-mail: [jmpl@uohyd.ac.in](mailto:jmpl@uohyd.ac.in)

**Fig. S1:**

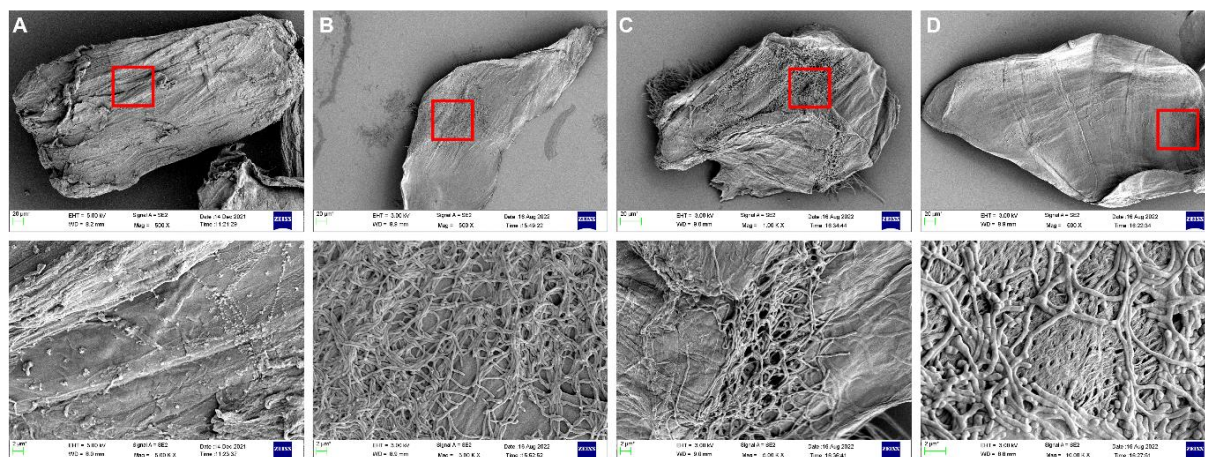

**Fig. S1.** FE-SEM micrographs showing the degradation of  $\beta$ -chitin by the *Streptomyces* spp. A – untreated  $\beta$ -chitin particle; B-D –  $\beta$ -chitin treated with *Streptomyces* sp. UH6, *S. coelicolor* and *S. griseus*, respectively. The upper panel represents the untreated and treated chitin particles, while the lower panel presents the close-up images of the target area (shown in red frame). In each panel, the scale bars of the images in the upper panel is 20  $\mu$ m and for those in the lower row, they are 2  $\mu$ m.

**Fig. S2:**

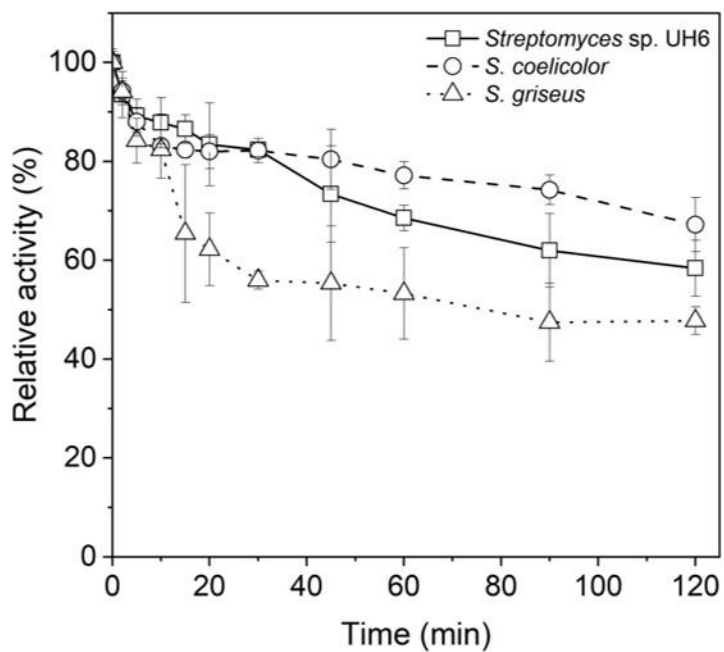

**Fig. S2.** Thermal stability of the *Streptomyces* spp. secretomes was assessed by pre-incubating the secretomes at 50°C for different time-intervals. The residual activity was estimated using Schales' assay. All assays were performed in triplicates, and error bars indicate standard deviation.

**Fig. S3:**

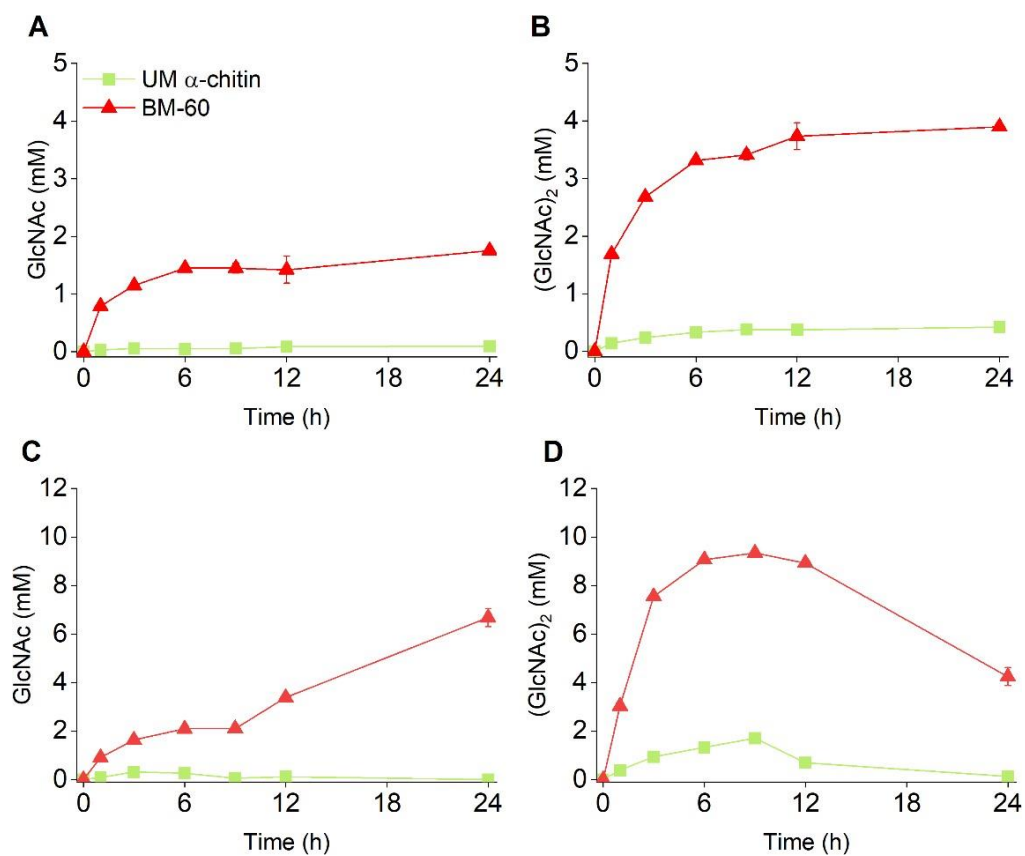

**Fig. S3.** A comparative analysis of GlcNAc and (GlcNAc)<sub>2</sub> production from un-milled  $\alpha$ -chitin (light green) and the ball-milled  $\alpha$ -chitin, BM-60 (red), using chitin-active-secretomes produced by *Paenibacillus* sp. LS1 (A and B) and *P. chitinolyticus* (C and D). All experiments were performed in biological triplicates and the error bars represent standard deviation.

**Fig. S4:**

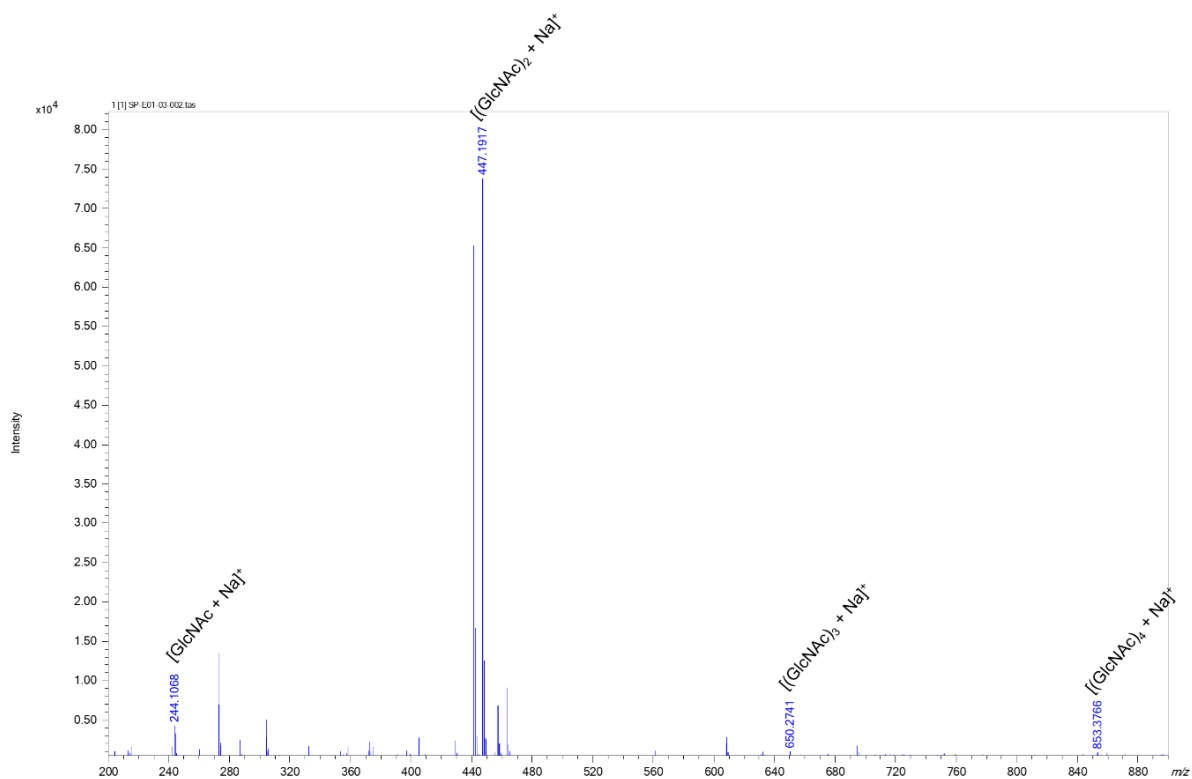

**Fig. S4.** MALDI-TOF-MS analysis of CHOS generated by the chitin-active-secretome of *Streptomyces* sp. UH6 from the ball-milled chitin substrate, BM-60. All identified masses were adducts of sodium [M+Na]<sup>+</sup> and labelled accordingly.
